# Supplementary material for: De novo transcriptome assembly: A comprehensive cross-species comparison of short-read RNA-Seq assemblers
Source: Oxford University Press journal article supplement (doi:10.1093/gigascience/giz039), 2019-05-01
Supplement: giz039_response_to_reviewer_comments_revision_2.pdf [file giz039_response_to_reviewer_comments_revision_2.pdf]

## Author's Response To Reviewer Comments

Close

I included the following requested changes:

1) added a reference [59] for the OSF and cited it in the data availability section

2) added a reference [60] for GigaDB and wrote in the data availability section:  
"Additional intermediate and final result files for evaluation tools such as BUSCO and TransRate as well as other results are also archived in the GigaScience GigaDB repository [60]."

3) added RRIDs for:

- Trans-ABYSS (RRID:SCR\_013322)
- Trinity (RRID:SCR\_013048)
- Oases (RRID:SCR\_011896)
- IDBA-Tran (RRID:SCR\_011891)
- SOAPdenovo-Trans (RRID:SCR\_013268)
- ABYSS (RRID:SCR\_010709)
- Velvet (RRID:SCR\_010755)
- SOAPdenovo2 (RRID:SCR\_014986)
- SPAdes (RRID:SCR\_000131)
- HISAT2 (RRID:SCR\_015530)
- BLASTX (RRID:SCR\_001653)
- UniProtKB/Swiss-Prot (RRID:SCR\_004426)
- BUSCO (RRID:SCR\_015008)

Thank you very much and best wishes,  
Martin Hoelzer

Close
